# Supplementary material for: What Do Program Directors Value in Personal Statements? A Qualitative Analysis
Source: PubMed Central journal article supplement — ATS Sch. 2020 Feb 21;1(1):44–54. doi: 10.34197/ats-scholar.2019-0004OC (PMC8043283; doi:10.34197/ats-scholar.2019-0004oc), 2020-02-21
Supplement: ats-scholar.2019-0004OC_hinkle_data_supplement.pdf [file ats-scholar.2019-0004OC_hinkle_data_supplement.pdf]

## Online Data Supplement

What Do Program Directors Value in Personal Statements? A qualitative survey evaluation

Laura Hinkle, MD

W. Graham Carlos, MD

Kristin Burkart, MD

Jennifer McCallister, MD

Gabriel Bosslet, MD

# What Program Directors look for in Personal Statements

Please complete the survey below.

Thank you!

---

1) How important is the personal statement when making the decision to offer an interview?

- Very important
- Important
- Moderately important
- Slightly important
- Not at all important (do not use)

---

2) How important is the personal statement when making rank order decisions?

- Very important
- Important
- Moderately important
- Slightly important
- Not at all important (do not use)

---

3) What does the personal statement tell you about an applicant?

---

4) What characteristics define a good personal statement?

---

5) What characteristics define a bad personal statement?

---

6) What advice do you give applicants for writing personal statements?

---

7) Where is your program located?

- 1. Midwest
  - 2. Northeast
  - 3. South
  - 4. West
  - 5. Outside of the United States
- 

8) What is your primary program affiliation?

- Academic
  - Community based
  - VA or military
- 

9) How many total fellows are in your program?

- 5 or fewer
  - 6-10
  - 11-15
  - 16-20
  - More than 20
- 

10) What is your role in the fellowship program?

- Program Director for Pulmonary and Critical Care Fellowship
  - Program Director for Pulmonary Fellowship
  - Program Director for Critical Care Fellowship
  - Associate Program Director for Pulmonary and Critical Care Fellowship
  - Associate Program Director for Pulmonary Fellowship
  - Associate Program Director for Critical Care Fellowship
- 

11) Gender

- Female
  - Male
  - Prefer not to answer
- 

12) Age (years)

- 40 or less
  - 41-60
  - Over 60
  - Prefer not to answer
- 

13) Years as Program Director

- 0-5
- 6-10
- 11-15
- 16-20
- More than 20

**Supplemental Digital Appendix 2: Code Book**

| <i>Category</i>                                                 | <i>Code</i>                                      | <i>Descriptor</i>                                                                                    |
|-----------------------------------------------------------------|--------------------------------------------------|------------------------------------------------------------------------------------------------------|
| <i>What the personal statement tells you about an applicant</i> |                                                  |                                                                                                      |
| <i>Applicant as a Person</i>                                    | Who the applicant is as a person                 | Priorities, personality, abilities and limitations                                                   |
| <i>Background Info</i>                                          | Explanation of gaps in training or problem areas |                                                                                                      |
|                                                                 | Interest in specialty                            | Why applicant wants to pursue a career in PCCM/CCM                                                   |
|                                                                 | Personal history                                 | Life experiences in and out of medicine, obstacles overcome                                          |
| <i>Communication Skills</i>                                     | Writing skills                                   | Grammar, organization, flow, writing style                                                           |
|                                                                 | Proficiency in English language                  | If English is a second language, is the applicant able to engage in written communication            |
| <i>Career Goals of Applicant</i>                                |                                                  | Expression of clinical/research/education interests                                                  |
| <i>Fit with Program</i>                                         |                                                  | Does this applicant seem like a good fit for our training program?                                   |
| <i>Human Qualities</i>                                          | Attention to detail                              |                                                                                                      |
|                                                                 | Creativity                                       | Did they show creativity/their own unique characteristics in the personal statement                  |
|                                                                 | Insightfulness                                   | Is there evidence that the applicant has an accurate and deep understanding of what they wrote about |
|                                                                 | Maturity                                         |                                                                                                      |
|                                                                 | Motivation                                       | Why has the applicant made the choices they have made in life and in medicine, drive to perform      |
|                                                                 | Professionalism                                  | Is the information provided truthful, did they author the personal statement                         |

**Supplemental Digital Appendix 2: Code Book**

|                                                                 |                                          |                                                                                                                                                 |
|-----------------------------------------------------------------|------------------------------------------|-------------------------------------------------------------------------------------------------------------------------------------------------|
|                                                                 |                                          | themselves or is there evidence of plagiarism, did they put in the effort to write a good personal statement                                    |
|                                                                 | Resilience                               | How did the applicant handle adversity                                                                                                          |
|                                                                 | Social pathologies                       | Arrogance, conceited                                                                                                                            |
|                                                                 | Thought processes                        | Reveals how applicant thinks about the topic they are writing about                                                                             |
|                                                                 | Work ethic                               | Does the applicant show that they will work hard                                                                                                |
| <i>Nothing</i>                                                  |                                          | No meaningful information obtained, PD does not pay attention to PS                                                                             |
| <b><i>Characteristics defining a bad personal statement</i></b> |                                          |                                                                                                                                                 |
| <i>Demonstrates poor communication skills</i>                   | Poorly written                           | Bad grammar, disorganized, misspellings                                                                                                         |
|                                                                 | Too long                                 |                                                                                                                                                 |
| <i>Important details are missing</i>                            | Goals                                    | No mention of career goals or life goals or goals are vague and generic                                                                         |
|                                                                 | Unusual circumstances are not addressed  | No explanation of poor performance, gaps in training, etc                                                                                       |
|                                                                 | Lack of personal detail                  | Cookie cutter statements, generic statements, looks like everyone else's, stereotyped, no insight in the individual's goals/personality/history |
|                                                                 | No explanation of events on life choices | Story or clinical case described with no explanation of how this event impacted direction of life/career                                        |
| <i>Miscellaneous turnoffs</i>                                   | Bad humor or sarcasm                     |                                                                                                                                                 |
|                                                                 | Grandiose future plans                   | Unrealistic expectations from training, unrealistic career expectations (i.e. triple threat)                                                    |

**Supplemental Digital Appendix 2: Code Book**

|                                                                  |                                                   |                                                                                                   |
|------------------------------------------------------------------|---------------------------------------------------|---------------------------------------------------------------------------------------------------|
|                                                                  | Hero story                                        | Story about greatest ICU save                                                                     |
|                                                                  | Name dropping                                     |                                                                                                   |
|                                                                  | Only interested in procedures                     |                                                                                                   |
|                                                                  | Osler/famous person quotes                        |                                                                                                   |
|                                                                  | Overblown expectations of what programs can offer |                                                                                                   |
|                                                                  | Sappy                                             | Excessively sentimental or emotional                                                              |
|                                                                  | Sensationalism                                    | Exciting or shocking stories or language at the expense of accuracy, in order to provoke interest |
| <i>Reveals undesirable character traits</i>                      | Arrogant                                          | Prideful                                                                                          |
|                                                                  | Egocentric                                        | Self-centered, self absorbed                                                                      |
|                                                                  | Exaggeration of accomplishments                   | Hyperbole                                                                                         |
|                                                                  | Insincerity                                       | Lack of authenticity, not genuine                                                                 |
|                                                                  | Lack of attention to detail                       |                                                                                                   |
|                                                                  | Lack of empathy                                   | Inability to identify with feelings or thoughts of others                                         |
|                                                                  | Lack of insight                                   | No evidence of accurate and deep understanding of the topic at hand                               |
|                                                                  | Lack of professionalism                           | Bad mouthing others, profanity, plagiarism                                                        |
|                                                                  | Worrisome work ethic                              |                                                                                                   |
| <i>Superfluous content</i>                                       | Contains irrelevant information                   | Stories with no connection to life choices, too long                                              |
|                                                                  | Regurgitates CV                                   |                                                                                                   |
| <b><i>Characteristics defining a good personal statement</i></b> |                                                   |                                                                                                   |
| <i>Allows reader to get to know applicant as a person</i>        | Ability to work with others                       | Ability to work on a team                                                                         |
|                                                                  | Curiosity                                         |                                                                                                   |
|                                                                  | Detail oriented                                   |                                                                                                   |

**Supplemental Digital Appendix 2: Code Book**

|                                                                                 |                                                                         |                                                                                              |
|---------------------------------------------------------------------------------|-------------------------------------------------------------------------|----------------------------------------------------------------------------------------------|
|                                                                                 | Humility                                                                | Ability to acknowledge flaws, modesty                                                        |
|                                                                                 | Insightful/thoughtful                                                   | Evidence that the applicant is able to think deeply and accurately about something           |
|                                                                                 | Interests outside of medicine                                           |                                                                                              |
|                                                                                 | Sense of humor                                                          |                                                                                              |
|                                                                                 | Unique                                                                  | Does the personal statement reflect the individual or look like most other statements        |
| <i>Authentic<br/>Provides Detail Not<br/>Found Elsewhere in<br/>Application</i> | Interest in specialty                                                   | Genuine, honest<br>Why choose PCCM/CCM?                                                      |
|                                                                                 | Defines career goals                                                    | Are they pursuing a career in academics, research, education, etc                            |
|                                                                                 | Describes fit with program                                              | Why is applicant specifically looking at this fellowship program                             |
|                                                                                 | Explanation of gaps/problem areas<br>Highlights/expands on achievements |                                                                                              |
|                                                                                 | Defines life goals                                                      |                                                                                              |
|                                                                                 | Describes preparation for specialty                                     | What specific things have been done that will allow candidate to quickly adapt to fellowship |
| <i>Written Communication<br/>Skills</i>                                         | Strong personal stories                                                 |                                                                                              |
|                                                                                 | Well written                                                            | Grammar, organization, flow, writing style                                                   |
|                                                                                 | Proficient in English language                                          | If English is a second language, is the applicant able to engage in written communication    |
|                                                                                 | Succinct                                                                |                                                                                              |



Supplemental Digital Appendix 2: Code Book

| <i>Advice for Writing Personal Statements</i> |                                                     |                                                                                                                 |
|-----------------------------------------------|-----------------------------------------------------|-----------------------------------------------------------------------------------------------------------------|
| <i>Global Advice</i>                          | Be Genuine                                          | Sincere, honest, authentic, straightforward                                                                     |
|                                               | Be humble                                           |                                                                                                                 |
|                                               | Be insightful/thoughtful                            |                                                                                                                 |
|                                               | Be original                                         |                                                                                                                 |
|                                               | Be positive                                         |                                                                                                                 |
|                                               | Be succinct                                         |                                                                                                                 |
|                                               | Do not stand out in a bad way                       |                                                                                                                 |
|                                               | Make it personal                                    | what makes the applicant who they are, what impactful experiences have they had in life, what makes them “tick” |
| <i>I do not provide advice</i>                |                                                     | Nobody asks, advice should not be needed, etc                                                                   |
| <i>Specific things to include</i>             | Career goals                                        | What kind of career is applicant hoping for?                                                                    |
|                                               | Stories that make a point in the personal statement | Clinical interaction if it highlights values                                                                    |
|                                               | Why will you be good at this specialty?             |                                                                                                                 |
|                                               | Experiences outside of medicine                     |                                                                                                                 |
|                                               | Explanation of gaps in training/problem spots       |                                                                                                                 |
|                                               | Weaknesses                                          | Weaknesses/struggles and how they were overcome                                                                 |
|                                               | Why interested in this specialty                    |                                                                                                                 |
|                                               | Expectations for fellowship                         |                                                                                                                 |
| <i>Things to Avoid</i>                        | Case reports                                        | Case reports with no “point”; does not highlight anything specifically                                          |
|                                               | Drama                                               |                                                                                                                 |
|                                               | Embellishment                                       | Exaggeration, making things sound more important than they are                                                  |
|                                               | Poetry                                              |                                                                                                                 |
|                                               | Quotes from famous people                           |                                                                                                                 |

## Supplemental Digital Appendix 2: Code Book

|                                |                                             |
|--------------------------------|---------------------------------------------|
| <i>Tips on Writing Process</i> | Allow time to do a good job                 |
|                                | Think about the message you want to deliver |
|                                | Proof read                                  |
|                                | Ask someone who knows you well to read it   |
